# Supplementary material
Source: PubMed Central journal article supplement (PMC3220464)
Supplement: supp_M111.235283_jbc.M111.235283-1.pdf [file supp_M111.235283_jbc.M111.235283-1.pdf]

**Supplementary Table 1.** Sequence of primers for quantitative real time-PCR

| Gene (mouse)    | Sequence of forward primer (5' to 3') | Sequence of reverse primer (5' to 3') |
|-----------------|---------------------------------------|---------------------------------------|
| Cyclophilin     | TGGCTCACAGTTCTTCATAACCA               | ATGACATCCTTCAGTGGCTTGTC               |
| Fbw7 $\alpha$   | CTCACCAGCTCTCCTCTCCATT                | GCTGAACATGGTACAAGGCCA                 |
| SREBP1c         | CGGCGCGGAAGCTGT                       | TGCAATCCATGGCTCCGT                    |
| ACC             | GGGCACAGACCGTGGTAGTT                  | CAGGATCAGCTGGGATACTGAGT               |
| FAS             | ATCCTGGAACGAGAACACGATCT               | AGAGACGTGTCACTCCTGGACTT               |
| Elovl6          | CCCGAACTAGGTGACACGAT                  | CCAGCGACCATGTCTTTGTA                  |
| SCD1            | AGATCTCCAGTTCTTACACGACCAC             | CTTTCATTTTCAGGACGGATGTCT              |
| ChREBP          | CTGGGGACCTAAACAGGAGC                  | GAAGCCACCCTATAGCTCCC                  |
| LDLR            | TGGAGGATGAGAACCGGCT                   | GCACTGAAAATGGCTTCGTTTA                |
| HMGCR           | GACAAGAAGCCTGCTGCCATA                 | CGTCAACCATAGCTTCCGTAGTT               |
| PPAR $\alpha$   | CCTCAGGGTACCACTACGGAGT                | GCCGAATAGTTCGCCGAA                    |
| ACO             | CGATCCAGACTTCCAACATGAG                | CCATGGTGGCACTCTTCTTAACA               |
| MCAD            | TGCTTTTGATAGAACCAGACCTACAGT           | CTTGGTGCTCCACTAGCAGCTT                |
| PPAR $\gamma$ 1 | GCGGCTGAGAAATCACGTTT                  | GAATATCAGTGGTTCACCGCTTC               |
| PPAR $\gamma$ 2 | AACTCTGGGAGATTCTCCTGTTGA              | GAAGTGCTCATAGGCAGTGCAT                |
| CD36            | CCAAATGAAGATGAGCATAGGACAT             | GTTGACCTGCAGTCGTTTTGTC                |
| GPAT            | GGCTACGTCCGAGTGGATTTT                 | AACATCATTCGGTCTTGAAGGAA               |
| DGAT1           | CGTGGTATCCTGAATTGGT                   | GGCGCTTCTCAATCTGAAAT                  |
| DGAT2           | ATCTTCTCTGTACCTGGCT                   | ACCTTCTTGGGCGTGTCC                    |
| KLF5            | ACCTTACAGCATCAACATGAACG               | TGGCTGAAAATGGTAACAGGTT                |
| G6Pase          | GGGCGCAGCAGGTGTATACTAT                | CAGAATCCCAACCACAAGATGA                |
| PEPCK           | TGTCATCCGCAAGCTGAAGA                  | TTCGATCCTGGCCACATCTC                  |
| GLUT2           | GGAACCTTGGCTTTCACTGTCTT               | GGAACACCCAAAACATGTTCGAT               |
| GK              | TCCCTGTAAGGCACGAAGACAT                | ATTGCCACCACATCCATCTCA                 |
| c-Jun           | CCTTCTACGACGATGCCCTC                  | GGTTCAAGGTCATGCTCTGTTT                |
| aP2             | TTTCCTTCAAACCTGGGCGTG                 | AGGGTTATGATGCTCTTCACCTTC              |
| IL-6            | TAGTCCTTCTACCCCAATTTCC                | TTGGTCCTTAGCCACTCCTTC                 |
| IL-1 $\beta$    | GCAACTGTTCTGAACTCAACT                 | ATCTTTTGGGGTCCGTCAACT                 |
| ApoB            | TTGGCAAACCTGCATAGCATCC                | TCAAATTGGGACTCTCCTTTAGC               |
| MTTP            | AGCTTTGTACCCGCTGTGC                   | TCCTGCTATGGTTTGTGGAAGT                |
